# Supplementary material
Source: HighWire-hosted journal article supplement (https://www.rcpjournals.org/highwire/filestream/7997/field_highwire_adjunct_files/0/Frearson_S1.pdf)
Supplement: Frearson_S1.pdf [file Frearson_S1.pdf]

**S1: Questionnaire**

Grade (please circle): ST6

ST1

F1

Did you feel that the near peer teaching session increased your knowledge in a specific area?

- Yes
- No
- Don't know

How would you rate the educational value of the near peer teaching session?

- 1 = Very low
- 2 = Low
- 3 = Moderate
- 4 = High
- 5 = Very high

How likely are you to consider participation in near peer teaching sessions in the future?

- 1 = Very unlikely
- 2 = Unlikely
- 3 = Neither unlikely nor likely
- 4 = Likely
- 5 = Very likely

Can you list some advantages of near peer teaching?

---

---

---

---

Can you list some disadvantages of near peer teaching?

---

---

---

---

Any other comments?

---

---

---
